# Supplementary material for: Travelers’ Attitudes, Behaviors, and Practices on the Prevention of Infectious Diseases: A Study for Non-European Destinations
Source: PubMed Central journal article supplement (PMC8002973; doi:10.3390/ijerph18063110), 2021-03-18
Supplement: ijerph-18-03110-s001.pdf [file ijerph-18-03110-s001.pdf]

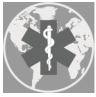

## File S1: Questionnaire

- Age group:

18–24;  25–34;  35–44;  45–54;  55–64;  >64;

- Gender:  M  F

- Citizenship:  Italian;  Foreign;  Others

- Actually, do you live in Italy?  Yes;  No

- Occupation:  Student;  Worker;  Houseworker;  Unemployed;  Retired

- Education:  Elementary diploma;  Secondary school education;  High school diploma;  University degree;  Postgraduate qualification

- Have you ever travelled outside the European Union?  Yes;  No

- Do you intend to make an international trip outside the European Union in the future?  Yes;  No

- Generally, for what reasons do you travel?  For work;  For Study;  Voluntary work;  Leisure/tourism;  To visit relatives and friends

- How long before the departure, do you plan your travel?  One month or more;  Between one month and 2 weeks before;  Less than two weeks before;  Only one week before

- Do you seek information about travel health risks before the departure?  Yes;  No

- If so, what are your information sources?  Health professional;  Family or friends;  Internet;  Embassies or consulates;  Vaccination clinics or travelers medical clinic;  Books; apps;  Travel agency;  Pharmacist;  Social networks

- Did you refuse or would refuse recommended vaccinations before a travel outside the European Union?  Yes;  No;  Do not know

- If so, why did/would you refuse them?  No enough time;  Not useful;  Fear of collateral effects;  cost;  Difficulties in gaining access to vaccination clinic;  Other

- When you travel, do you pay attention to the following products?

Raw fruits and vegetables;  Tap water;  Ice cubes;  Bottled water;  Raw seafood
